# Supplementary material for: Mechanochemical synthesis of zinc-doped hydroxyapatite for tunable micronutrient release
Source: Royal Society of Chemistry journal article supplement (doi:10.1039/d3mr00012e), 2024-01-01
Supplement: d3mr00012e1.pdf [file d3mr00012e1.pdf]

## Supplementary Figures

### Mechanochemical synthesis of zinc-doped hydroxyapatite for tunable micronutrient release

Mohamed Ammar,<sup>1</sup> Ricardo Bortoletto-Santos,<sup>2</sup> Caue Ribeiro,<sup>3</sup> Lihua Zhang<sup>4</sup> and Jonas Baltrusaitis<sup>1,\*</sup>

<sup>1</sup>Department of Chemical and Biomolecular Engineering, Lehigh University, 111 Research Dr., Bethlehem, PA 18015, USA

<sup>2</sup>Postgraduate Program in Environmental Technology, University of Ribeirão Preto (UNAERP), Avenida Costábile Romano, 2201, Ribeirão Preto, SP, 14096-900, Brazil

<sup>3</sup>Embrapa Instrumentation, Rua XV de Novembro 1452, São Carlos, SP, 13560-970, Brazil

<sup>4</sup>Brookhaven National Laboratory, Center for Functional Nanomaterials, Upton, NY 11973, USA

#### Abstract

\* Correspondence: J. Baltrusaitis, [job314@lehigh.edu](mailto:job314@lehigh.edu); (+1-610-658-6836).

**Keywords:** hydroxyapatite; mechanochemistry; micronutrient; zinc; dissolution

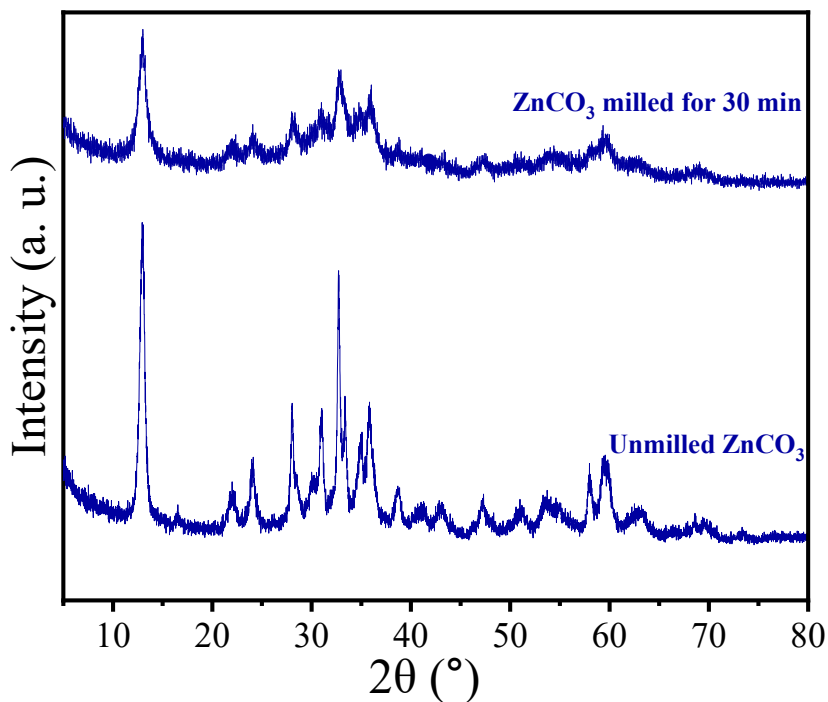

Figure 1S. XRD patterns for pure unmilled  $\text{ZnCO}_3$  and  $\text{ZnCO}_3$  after milling for 30 min.

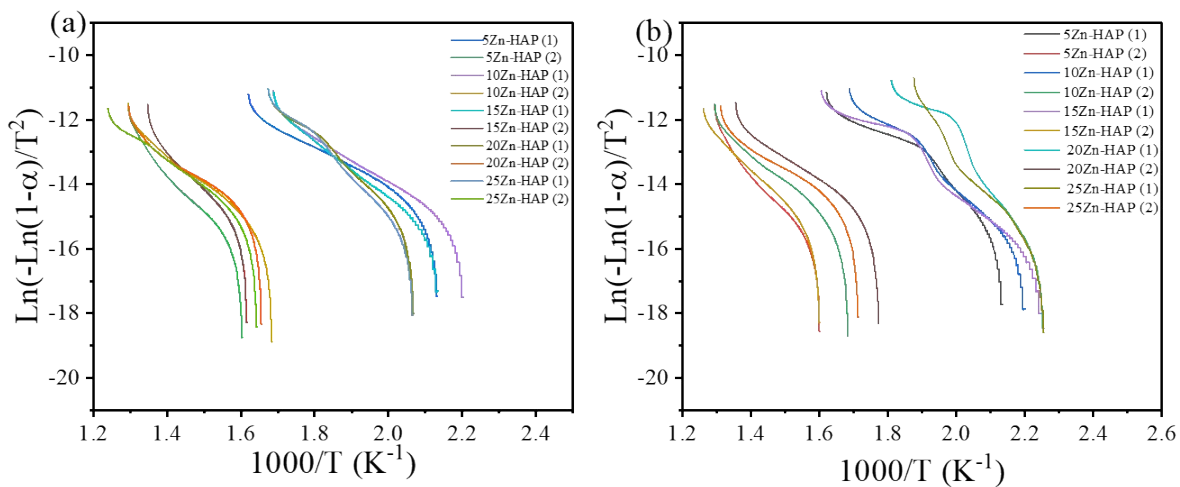

Figure 2S. The intermediate curves obtained from Coats – Redfern (CR) model; (a) (5-25)Zn-HAP mill and (b) (5-25)Zn-HAP mix; the number between brackets (1) and (2) indicate the temperature range; (30-350) °C and (350-500) °C, respectively.

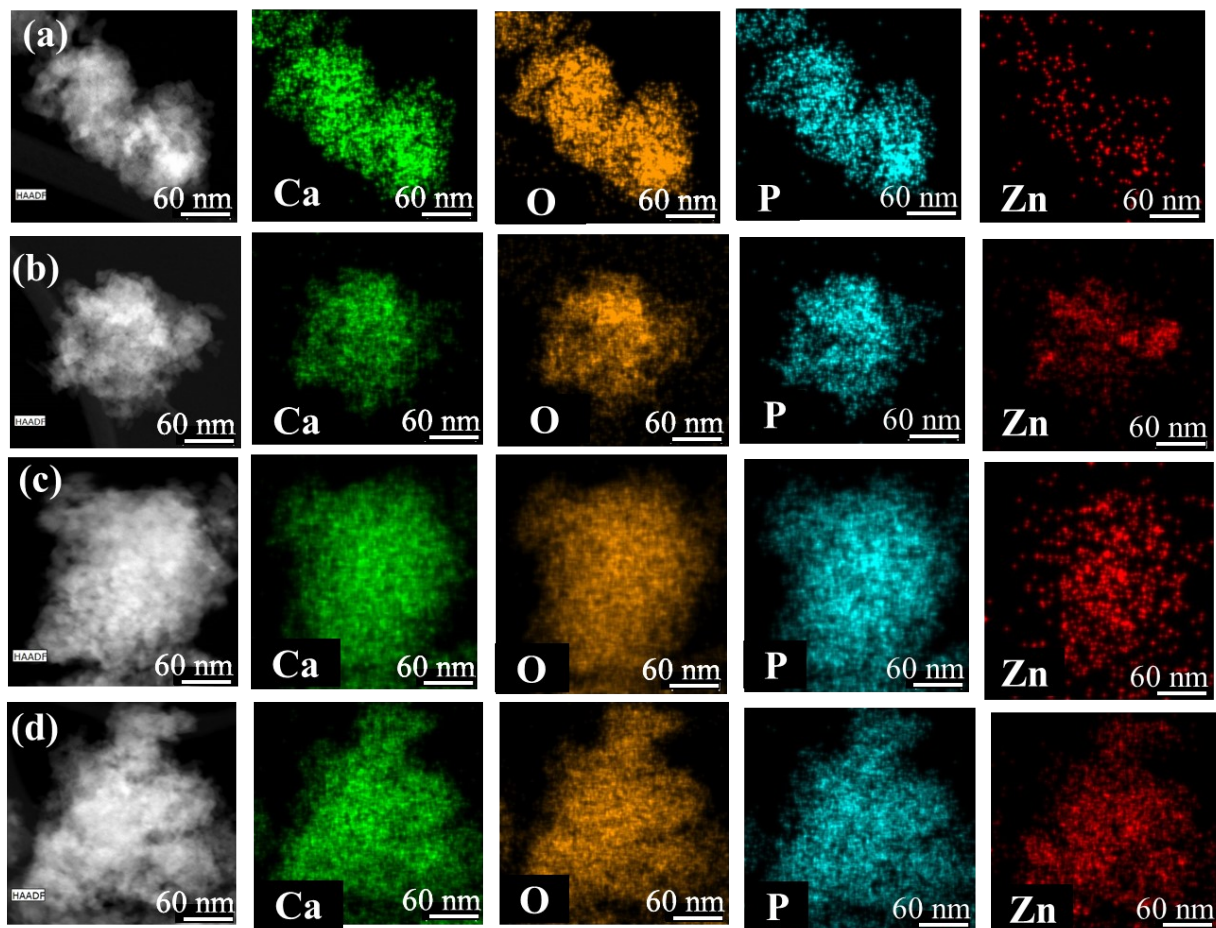

Figure 3S. (a) EDS elemental mapping (a) 5.0Zn-HAP (mill), (b) 25Zn-HAP (mill), (C) 5.0Zn-HAP (mix), and (d) 25Zn-HAP (mix).

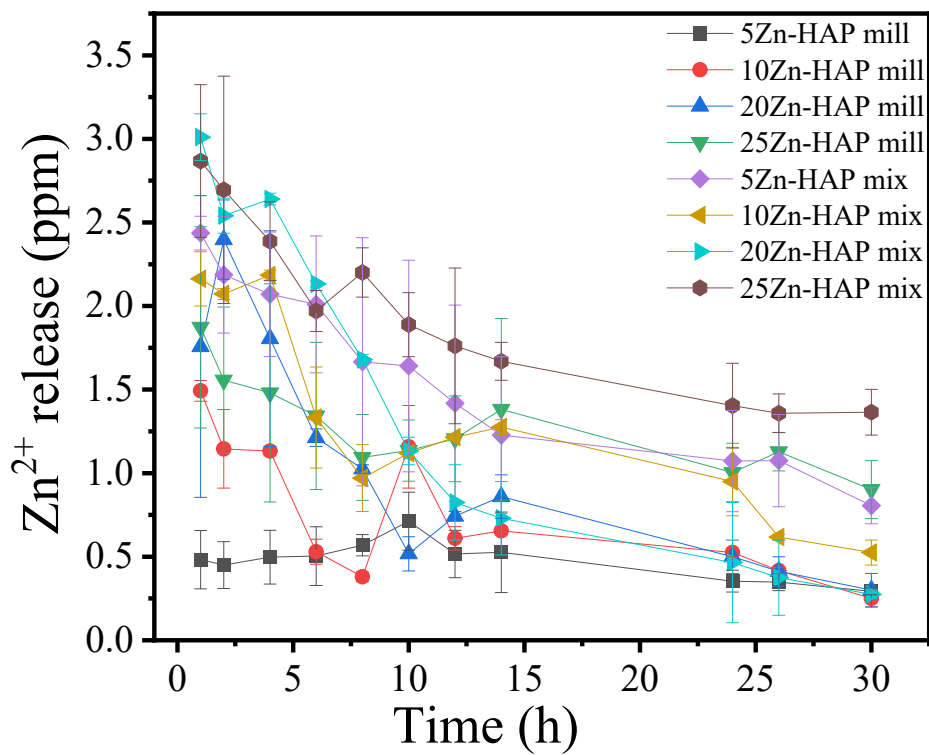

Figure 4S. Temporal pattern of  $Zn^{2+}$  ion release for 5, 10, 20, and 25Zn-HAP (mill) and for 5, 10, 20, and 25Zn-HAP (mix) samples. Error bars represent triplicate measurement.
